# Supplementary material
Source: PubMed Central journal article supplement (PMC9012334)
Supplement: NIHMS1605908-supplement-1.pdf [file NIHMS1605908-supplement-1.pdf]

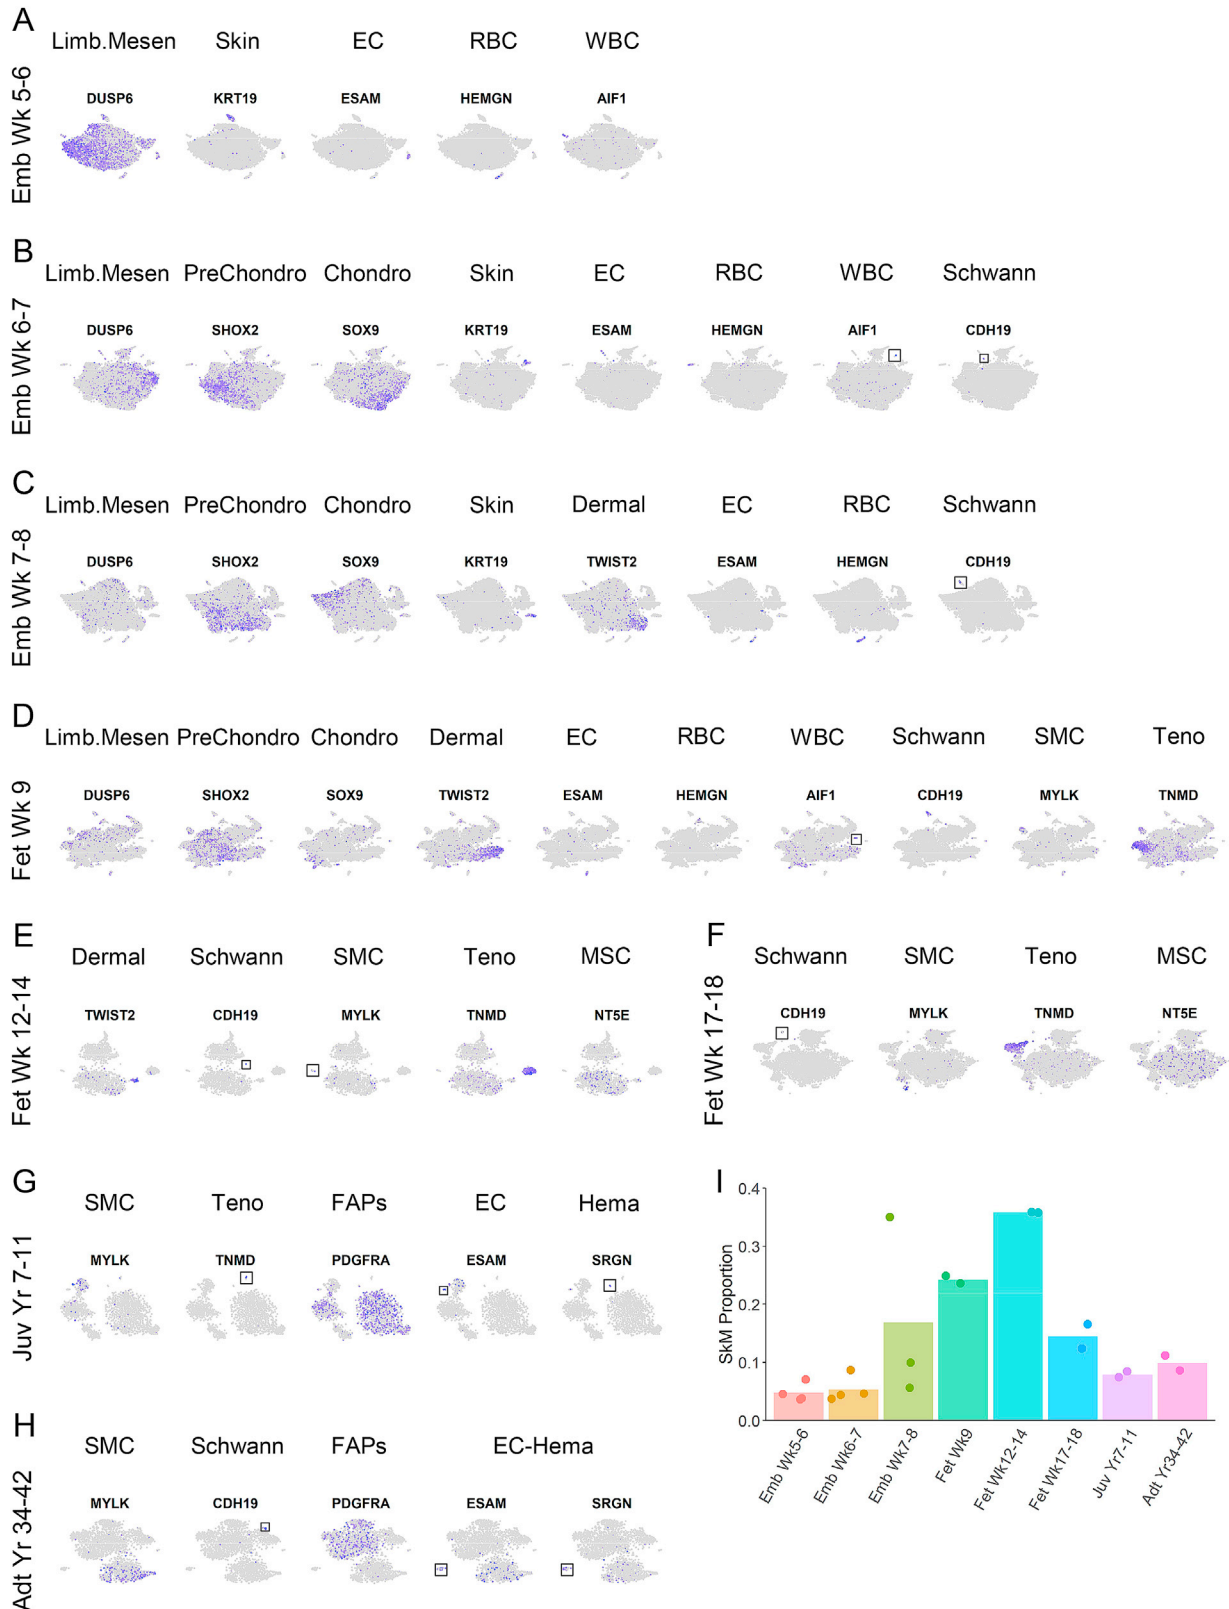

Figure S1. Cell Types Present in Limbs and Skeletal Muscle Tissues at Different Human Developmental Stages, Related to Figure 1, corrected

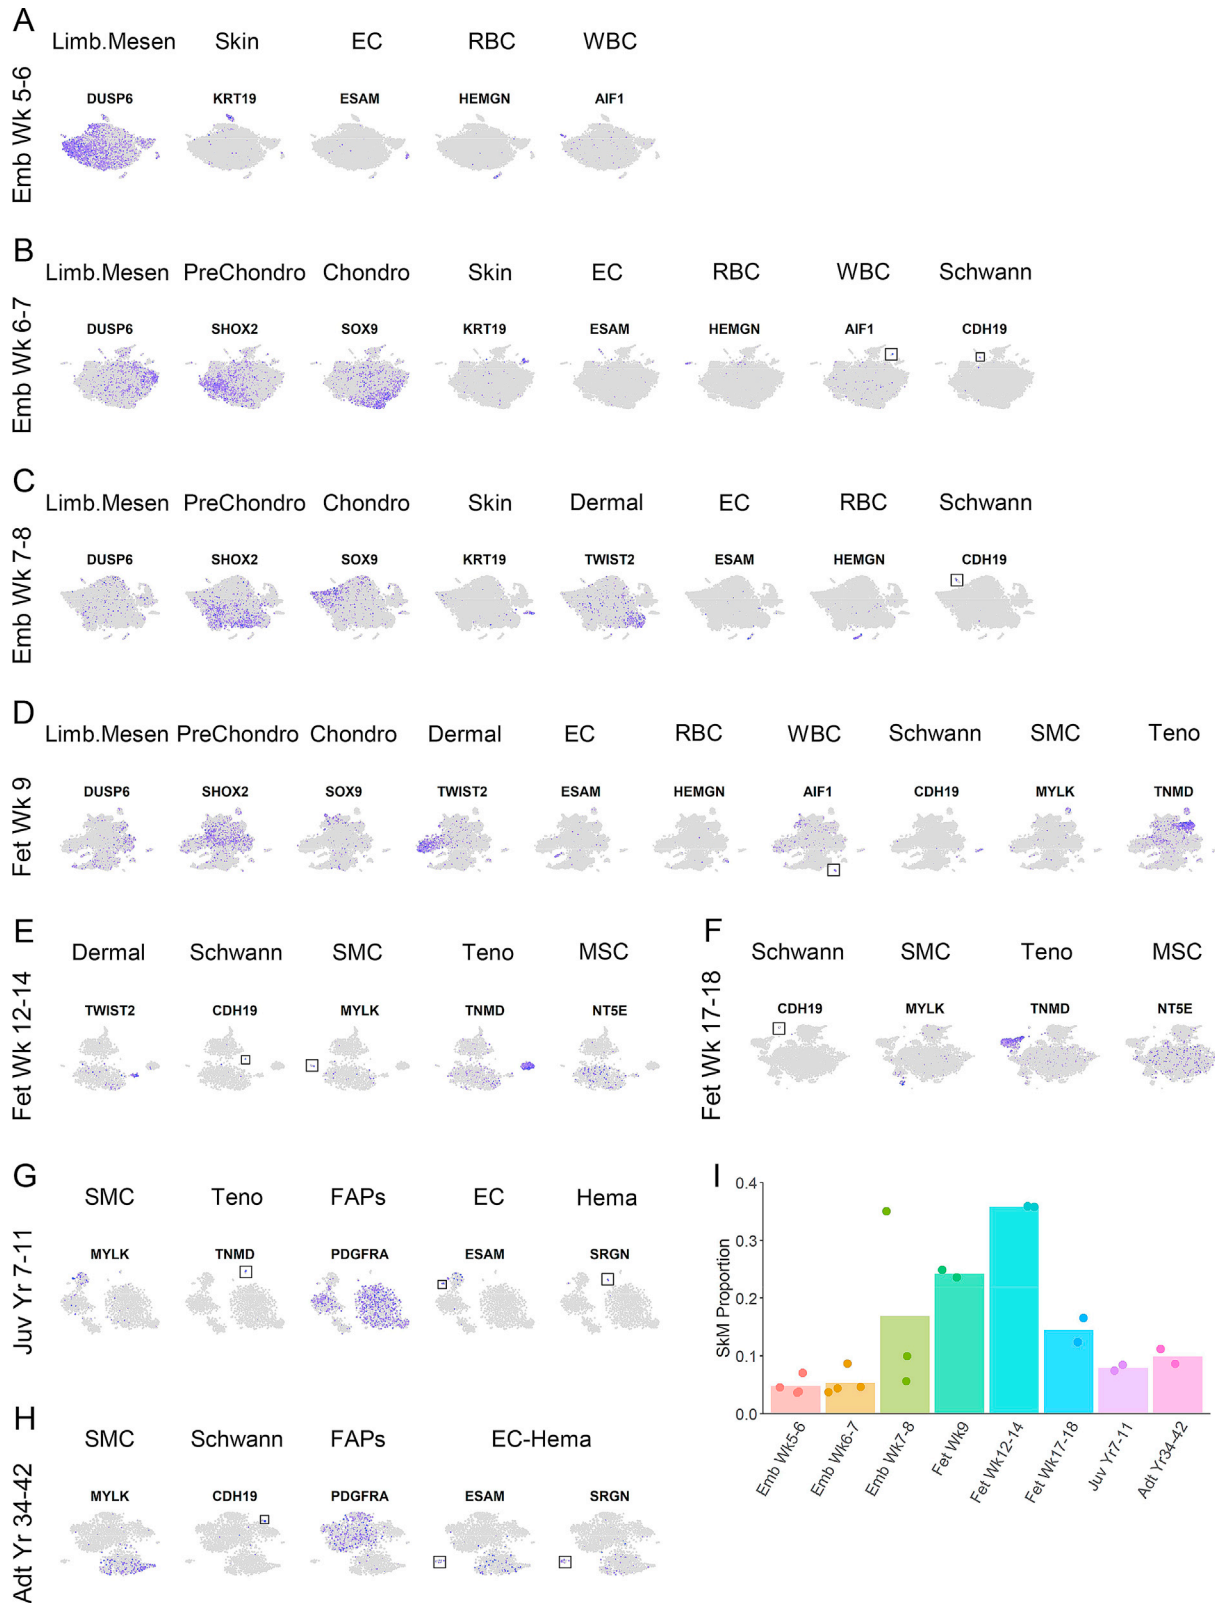

Figure S1. Cell Types Present in Limbs and Skeletal Muscle Tissues at Different Human Developmental Stages, Related to Figure 1, original
